# Supplementary material for: Protective strategy for the caudate lobe bile duct during left hemihepatectomy based on imaging data analysis
Source: PubMed Central journal article supplement — Ann Surg Treat Res. 2023 Nov 29;105(6):369–75. doi: 10.4174/astr.2023.105.6.369 (PMC10703581; doi:10.4174/astr.2023.105.6.369), 2023-11-29
Supplement: astr-105-369-s001.pdf [file astr-105-369-s001.pdf]

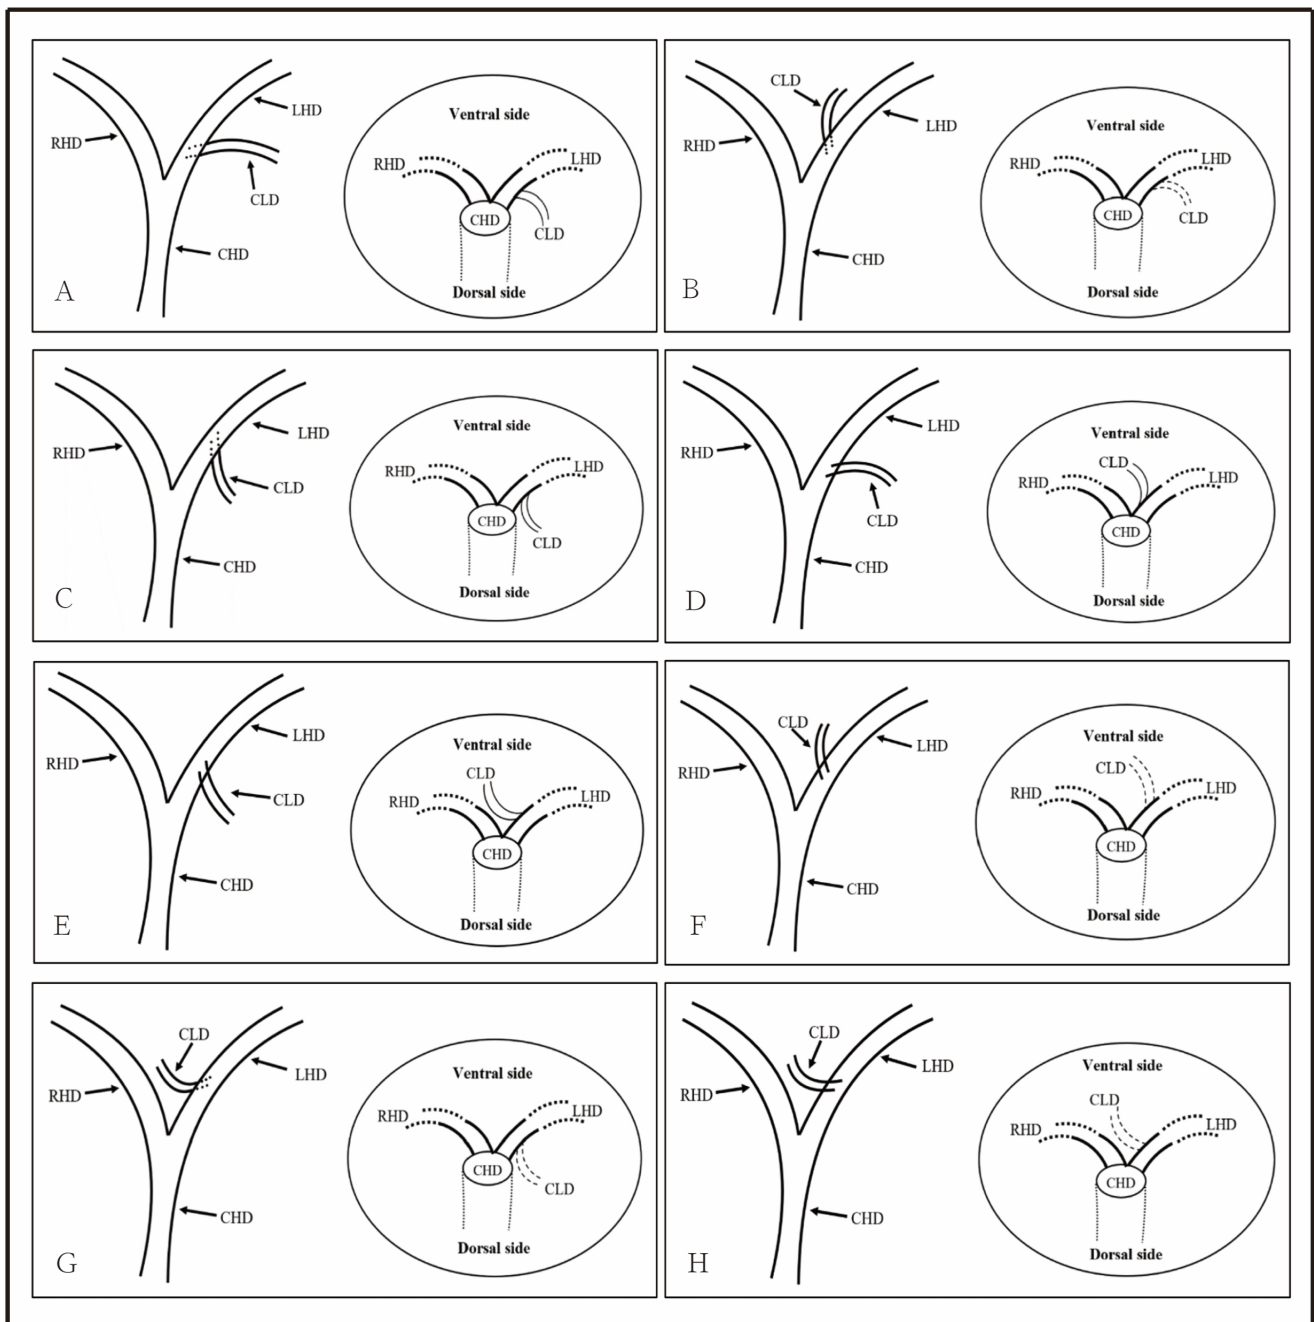

**Supplementary Fig. 1.** Eight types of schematic diagrams of the caudate lobe bile duct (CLD) converging into the left hepatic duct (LHD) at acute and obtuse angles on the coronal plane and cross-section. (A) Convergence from the foot side and dorsal side at acute angles. (B) Confluence from the cranial side and dorsal side at an acute angle. (C) Confluence from the foot side and dorsal side at an obtuse angle. (D) Confluence from the foot side and ventral side at an acute angle. (E) Entry from the foot side and ventral side at an obtuse angle. (F) Confluence from the cranial side and ventral side at an acute angle. (G) Entry from the cranial side and dorsal side at an obtuse angle. (H) Entry from the cranial side and ventral side at an obtuse angle. CHD, common hepatic duct; RHD, right hepatic duct.
