# Supplementary material for: Protective strategy for the caudate lobe bile duct during left hemihepatectomy based on imaging data analysis
Source: PubMed Central journal article supplement — Ann Surg Treat Res. 2023 Nov 29;105(6):369–75. doi: 10.4174/astr.2023.105.6.369 (PMC10703581; doi:10.4174/astr.2023.105.6.369), 2023-11-29
Supplement: astr-105-369-s002.pdf [file astr-105-369-s002.pdf]

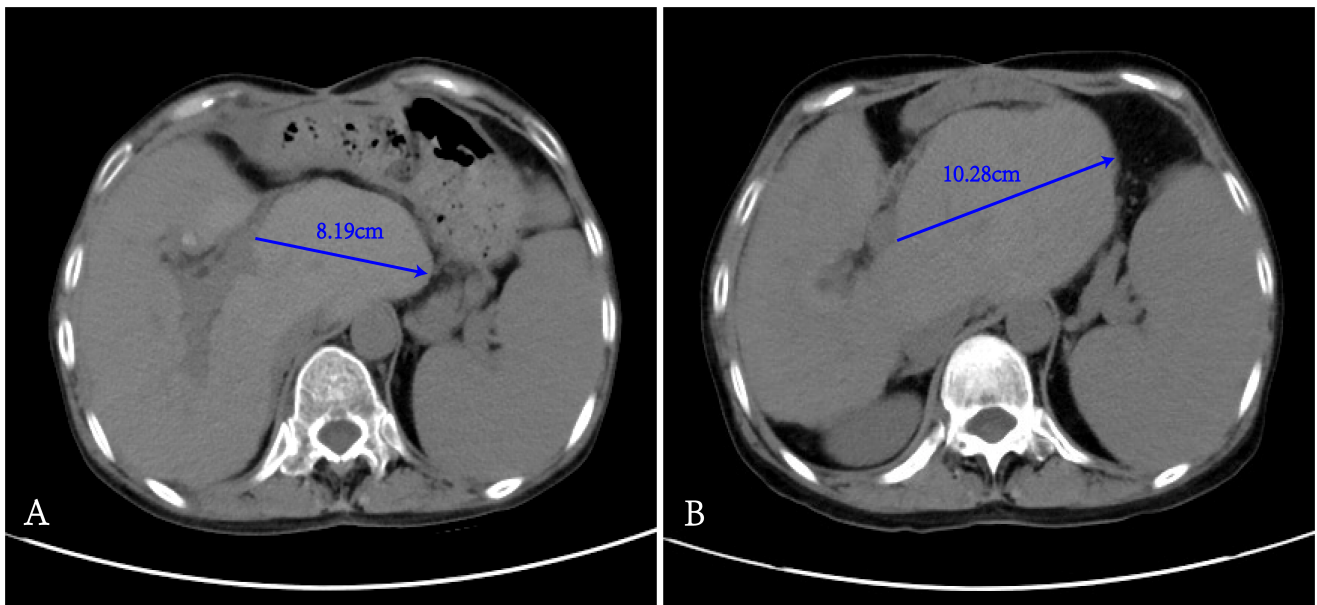

**Supplementary Fig. 2.** One patient had significant compensatory enlargement of the caudate lobe after an operation. The caudate lobe before (A) and after (B) operation.
